# Supplementary material
Source: PubMed Central journal article supplement (PMC8352567)
Supplement: NIHMS1727720-supplement-Supplemental_Material.pdf [file NIHMS1727720-supplement-Supplemental_Material.pdf]

Predictors of Cognitive Decline in a Multi-Ethnic Sample of Midlife Women: A Longitudinal Study

Supplemental Materials

**Introduction**

**Risk Factors of Cognitive Decline in Older and Midlife Adults.** There is cross-sectional and longitudinal evidence of depressive symptoms, diabetes, hypertension, and smoking predicting poorer cognition in older adults (Table 1) and midlife adults (Table 2). Results are largely mixed in both age groups. Several studies have also examined racial group differences between European Americans and African Americans (Table 3). In previous literature, diabetes was associated with poorer cognition in African Americans, hypertension was associated with poorer cognition for European Americans. The evidence for smoking and depressive symptoms were mixed.

**Results**

**Association between Practice Effects and Cognition.** We determined whether the practice effects for episodic memory, processing speed, and working memory were associated with cognitive scores at the end of the study. Practice effect was associated better episodic memory ( $b = 0.365, p < 0.001$ ), processing speed ( $b = 1.218, p < 0.001$ ), and working memory ( $b = 0.231, p < 0.001$ ). Thus, consistent with previous research, greater practice effects – which indicate gains from repeat administration of the same test – were associated with better cognitive outcomes at the end of the study.

**Tables**

Table 1

*Studies Examining Cognitive Decline in Older Adult Samples*

|                     | Processing Speed                           | Working Memory                              | Episodic Memory                                | Global Cognition                                                                  |
|---------------------|--------------------------------------------|---------------------------------------------|------------------------------------------------|-----------------------------------------------------------------------------------|
| Diabetes            | + Arvanitakis et al., 2004                 | - Arvanitakis et al., 2004                  | + Okereke et al., 2008                         | - Arvanitakis et al 2010 (cross-sectional)                                        |
|                     | + Hassing et al., 2004                     | - Hassing et al., 2004                      | + Pappas et al., 2017                          | + Okereke et al., 2008                                                            |
|                     | + Knopman et al., 2009                     | - Espeland et al., 2011                     | + Wennberg et al., 2017                        | + Crowe et al., 2010                                                              |
|                     | + Gregg et al., 2000                       | -Arvanitakis et al., 2010 (cross-sectional) | + Espeland et al., 2011                        | + Gregg et al., 2000                                                              |
|                     | - Arvanitakis et al 2010 (cross-sectional) |                                             | -Arvanitakis et al., 2004                      | + Mayeda et al., 2016                                                             |
|                     | - Bangen et al. 2015                       |                                             | - Hassing et al., 2004                         |                                                                                   |
| Hypertension        | + Hajjar et al. 2017                       | 0                                           | - Schneider et al., 2014                       | + Gifford et al., 2013 (cross-sectional)                                          |
|                     | - Knopman et al., 2009                     |                                             | - Knopman et al., 2009                         | + Gatto et al, 2008 (cross-sectional)<br>+Obisesan et al., 2008 (cross-sectional) |
| Smoking             | 0                                          | 0                                           | + Reitz et al., 2005<br>- Vasquez et al., 2016 | + Collins et al., 2009<br>+ Ott et al., 2004<br>+ Anstey et al., 2007             |
| Depressive Symptoms | + Bielak et al., 2011                      | 0                                           | + Gonzalez et al., 2008                        | + Kohler et al., 2010                                                             |
|                     | + Kohler, et al., 2010                     |                                             | - Ganguli et al., 2006                         | + Hazzouri et al., 2014                                                           |
|                     | + Brewster et al, 2017 (cross-sectional)   |                                             | - Royall et al., 2012                          | + Paterniti et al., 2002                                                          |
|                     | + Hamilton et al, 2014 (cross-sectional)   |                                             | + Kohler et al., 2010                          | + Chodosh et al., 2007                                                            |
|                     |                                            |                                             | + Panza et al., 2009                           | + Dotson et al., 2008                                                             |
|                     |                                            |                                             | + Gallagher et al., 2016                       | + Wilson et al., 2004 (composite score)                                           |
|                     |                                            |                                             | + Brewster et al, 2017 (cross-sectional)       | + Goveas et al 2014                                                               |
|                     |                                            |                                             | + Hamilton et al, 2014 (cross-sectional)       | + Baer et al., 2012                                                               |
|                     |                                            | + Evans et al. 2019 (cross-sectional)       | +Panza et al., 2009                            |                                                                                   |

*Note.* + = positive association; - = negative association

## Running Head: RACE MODERATES RISK FACTORS OF COGNITIVE DECLINE

Table 2

*Studies Examining Cognitive Decline in Midlife Adult Samples*

|                     | Processing Speed                                                                                | Working Memory        | Episodic Memory                                                                                                                                                                        | Global Cognition                                                                                                        |
|---------------------|-------------------------------------------------------------------------------------------------|-----------------------|----------------------------------------------------------------------------------------------------------------------------------------------------------------------------------------|-------------------------------------------------------------------------------------------------------------------------|
| Diabetes            | + Knopman et al., 2001<br>- Anstey et al., 2014                                                 | - Anstey et al., 2014 | - Debette et al., 2011<br>- Anstey et al., 2014<br>-Knopman et al., 2001                                                                                                               | + Rawlings et al., 2014<br>(midlife diabetes and<br>cognition examined 20<br>years later)<br><br>+ Nooyens et al., 2010 |
| Hypertension        | + Knopman et al., 2001<br>-Anstey et al., 2014<br><br>+ Tarraf et al. 2017<br>(cross-sectional) | -Anstey et al., 2014  | - Debette et al., 2011<br>- Anstey et al., 2014<br><br>-Knopman et al., 2001<br><br>+ Singh-Manoux et al.,<br>2005 (cross-sectional)<br><br>+ Tarraf et al., 2017<br>(cross-sectional) | 0                                                                                                                       |
| Smoking             | - Knopman et al., 2001<br>+ Anstey et al., 2014<br>- Richards et al., 2003                      | - Anstey et al., 2014 | - Debette et al., 2011<br>- Anstey et al., 2014<br>- Knopman et al., 2001<br><br>+ Richards et al., 2003                                                                               | + Sabia et al., 2012                                                                                                    |
| Depressive Symptoms | - Anstey et al, 2014                                                                            | - Anstey et al., 2014 | -Anstey et al., 2014<br><br>+ Singh-Manoux et al.,<br>2010 (cross-sectional)                                                                                                           | + Singh-Manoux et al.,<br>2010 (cross-sectional)                                                                        |

*Note.* + = positive association; - = negative association

Running Head: RACE MODERATES RISK FACTORS OF COGNITIVE DECLINE

Table 3

*Racial Group Differences in Cognitive Decline Between European Americans and African Americans*

|                     | Processing Speed                                                                        |                                                                                               | Episodic Memory                                                                                  |                                                                                                  | Working Memory                                                         |                                                                                            |
|---------------------|-----------------------------------------------------------------------------------------|-----------------------------------------------------------------------------------------------|--------------------------------------------------------------------------------------------------|--------------------------------------------------------------------------------------------------|------------------------------------------------------------------------|--------------------------------------------------------------------------------------------|
|                     | EA                                                                                      | AA                                                                                            | EA                                                                                               | AA                                                                                               | EA                                                                     | AA                                                                                         |
| Diabetes            | - Mayeda et al., 2014 (midlife)                                                         | + Mayeda et al., 2014 (midlife)                                                               | - Rajan et al., 2016 (older adults; composite score with executive function and global function) | + Rajan et al., 2016 (older adults; composite score with executive function and global function) | - Dore et al., 2016 (cross-sectional; interaction with poverty status) | + Dore et al., 2016 (cross-sectional; interaction with poverty status/below poverty level) |
|                     | * Knopman et al., 2001 (midlife)                                                        | * Knopman et al., 2001 (midlife)                                                              |                                                                                                  |                                                                                                  |                                                                        |                                                                                            |
|                     | - Obidi et al., 2008 (cross-sectional; older adults)                                    | + Obidi et al., 2008 (cross-sectional; older adults)                                          | - Dore et al., 2016 (cross-sectional; interaction with poverty status)                           | + Dore et al., 2016 (cross-sectional; interaction with poverty status/below poverty level)       |                                                                        |                                                                                            |
|                     | * Knopman et al 2009 (midlife)                                                          | * Knopman et al 2009 (midlife)                                                                |                                                                                                  |                                                                                                  |                                                                        |                                                                                            |
| Hypertension        | + Gottesman et al., 2014 (midlife)                                                      | - Gottesman et al., 2014 (midlife)                                                            |                                                                                                  | 0                                                                                                |                                                                        | 0                                                                                          |
|                     | + Knopman et al., 2001 (midlife)                                                        | -Knopman et al., 2001 (midlife)                                                               |                                                                                                  |                                                                                                  |                                                                        |                                                                                            |
| Smoking             | - Knopman et al., 2001 (midlife)                                                        | + Knopman et al., 2001 (midlife)                                                              | + Schneider et al., 2014 (older adults)                                                          | - Schneider et al., 2014 (older adults)                                                          |                                                                        | 0                                                                                          |
| Depressive Symptoms | * Wilson et al., 2004 (older adults; composite of episodic memory and processing speed) | * Wilson et al., 2004 (older adults; composite score of episodic memory and processing speed) | * Wilson et al., 2004 (older adults; composite of episodic memory and processing speed)          | * Wilson et al., 2004 (older adults; composite of episodic memory and processing speed)          |                                                                        | 0                                                                                          |
|                     |                                                                                         |                                                                                               | *Sol et al., 2020 (older adults)                                                                 | *Sol et al., 2020 (older adults)                                                                 |                                                                        |                                                                                            |
|                     | + Zahodne et al., 2014 (older adults; cross-sectional)                                  | - Zahodne et al., 2014 (older adults; cross-sectional)                                        | - Zahodne et al., 2014 (older adults; cross-sectional)                                           | + Zahodne et al., 2014 (older adults; cross-sectional)                                           |                                                                        |                                                                                            |

Note.+ = positive association; - = negative association; \* = no racial differences; EA = European Americans; AA = African Americans

Table 4

*Standardized Regression-Based Formulas for Practice Effects*

| Outcome          | Formulas                                                               |
|------------------|------------------------------------------------------------------------|
| Episodic Memory  | $T2' = c + (b*T1) + (b*Education)$<br>$RCISRB = T2 - T2' / SEE$        |
| Processing Speed | $T2' = c + (b*T1) + (b*Age) + (b*Income)$<br>$RCISRB = T2 - T2' / SEE$ |
| Working Memory   | $T2' = c + (b*T1) + (b*Education)$<br>$RCISRB = T2 - T2' / SEE$        |

*Notes.* T<sub>1</sub> = score at Time 1 (Visit 4 raw score); T<sub>2</sub> = score at Time 2 (Visit 6 raw score); T<sub>2</sub>' = predicted Time 2 score; b = unstandardized coefficient (beta-weights); c = intercept of the regression model (constant); SEE = standard error of the estimate; RCI = reliable change index; SRB = standardized regression-based formula; education is measured in years and the income is indicated by level (from less than \$19,999 and \$100,000 and greater). Linear regression determines which variables are predictive of Time 2 score.
